# Supplementary material for: Osteoderm distribution has low impact on the centre of mass of stegosaurs
Source: Copernicus journal article supplement (doi:10.5194/fr-17-33-2014), 2014-03-07
Supplement: Supplementary file 1 [file fr-17-33-2014-supplement.zip]

The files contained in the ZIP are polymeshes (STL format) of the *Kentrosaurus* 3D model. Only the left side is contained for bilaterally symmetrical elements in order to reduce file size.
